# Supplementary material for: Redox chemistry of a binary transition metal oxide (AB2O4): a study of the Cu2+/Cu0 and Fe3+/Fe0 interconversions observed upon lithiation in a CuFe2O4 battery using X-ray absorption spectroscopy
Source: Royal Society of Chemistry journal article supplement (doi:10.1039/c6cp02974d), 2016-01-01
Supplement: c6cp02974d1.pdf [file c6cp02974d1.pdf]

## SUPPLEMENTARY INFORMATION

### Redox chemistry of a binary transition metal oxide ( $AB_2O_4$ ): A study of the $Cu^{2+}/Cu^0$ and $Fe^{3+}/Fe^0$ interconversions observed upon lithiation in a $CuFe_2O_4$ battery using X-ray Absorption Spectroscopy

Christina A. Cama<sup>a</sup>, Christopher J. Pelliccione<sup>b</sup>, Alexander B. Brady<sup>c</sup>, Jing Li<sup>c</sup>, Eric A. Stach<sup>b</sup>, Jiajun Wang<sup>b</sup>, Jun Wang<sup>b</sup>, Esther S. Takeuchi<sup>a,b,c,\*</sup>, Kenneth J. Takeuchi<sup>a,c,\*</sup>, Amy C. Marschilok<sup>a,c,\*</sup>

a. Department of Chemistry, Stony Brook University, Stony Brook, NY 11794

b. Energy Sciences Directorate, Brookhaven National Laboratory, Upton, NY 11973

c. Department of Materials Science and Engineering, Stony Brook University, Stony Brook, NY 11794

\*corresponding authors: (EST) [esther.takeuchi@stonybrook.edu](mailto:esther.takeuchi@stonybrook.edu), (KJT) [kenneth.takeuchi.1@stonybrook.edu](mailto:kenneth.takeuchi.1@stonybrook.edu), (ACM) [amy.marschilok@stonybrook.edu](mailto:amy.marschilok@stonybrook.edu)

Table S1: Atomic positions from Rietveld refinement of synchrotron XRD data.

| Atom     | X | Y        | Z         | Uiso      |
|----------|---|----------|-----------|-----------|
| Cu (oct) | 0 | 0        | 0.5       | 0.000(10) |
| Fe (oct) | 0 | 0        | 0.5       | 0.01(2)   |
| Fe (tet) | 0 | 0.75     | 0.125     | 0.011(1)  |
| O        | 0 | 0.010(1) | 0.2479(8) | 0.008(1)  |

Table S2: LCF Results of TXM samples.

| State                                    | Fe K - edge     |           |          |        |                  | Cu K - edge     |          |        |                  |
|------------------------------------------|-----------------|-----------|----------|--------|------------------|-----------------|----------|--------|------------------|
|                                          | R-factor cutoff | % Fe(III) | %Fe (II) | %Fe(0) | Reduced $\chi^2$ | R-factor cutoff | %Cu (II) | %Cu(0) | Reduced $\chi^2$ |
| As synthesized                           | 0.03            | 96        | 3.8      | 0      | 4E-3             | 0.07            | 100      | 0      | 3E-3             |
| Partially discharged (1.5V, 2.1e-)       | 0.007           | 72        | 17       | 10     | 9E-4             | 0.03            | 21       | 79     | 4E-4             |
| Fully discharged (0.5V, 7.3e-)           | 0.01            | 28        | 12       | 60     | 1E-3             | 0.04            | 13       | 87     | 5E-3             |
| Discharged, then Charged (3.5 V, 3.4 e-) | 0.01            | 55        | 22       | 23     | 3E-4             | 0.03            | 10       | 90     | 4E-4             |

Figure S1: Electrochemical Data for Electrode C. Discharged at 80 mA/g to 1.0 V, then charged to 3.5 V, held at 3.5V for 2 hours.

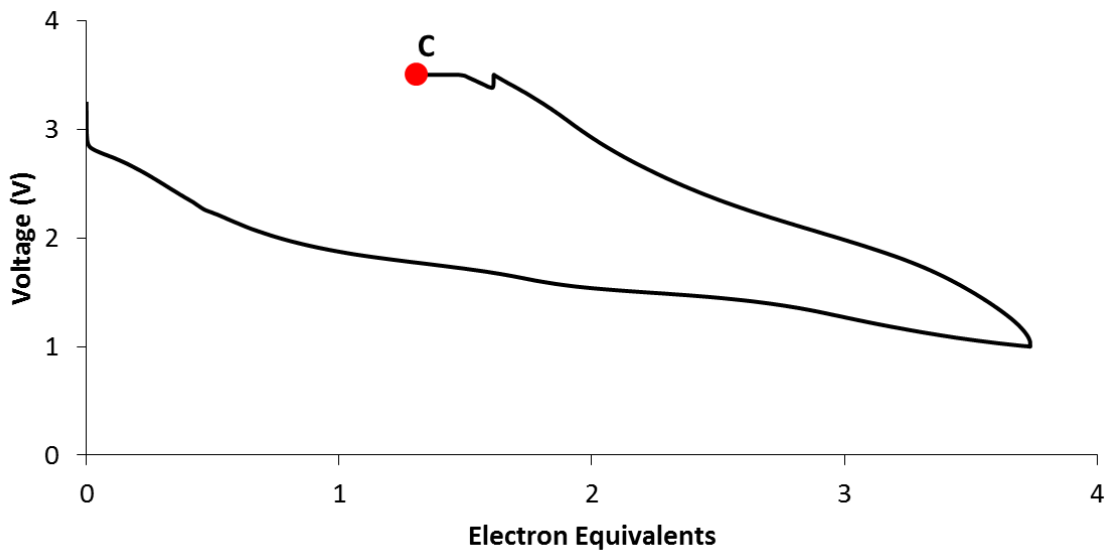

Figure S2: Electrochemical Data for Electrode D. Discharged at 80 mA/g to 1.0 V, then charged to 3.5 V, held at 3.5 V for 2 hours, then discharged again to 1.0 V

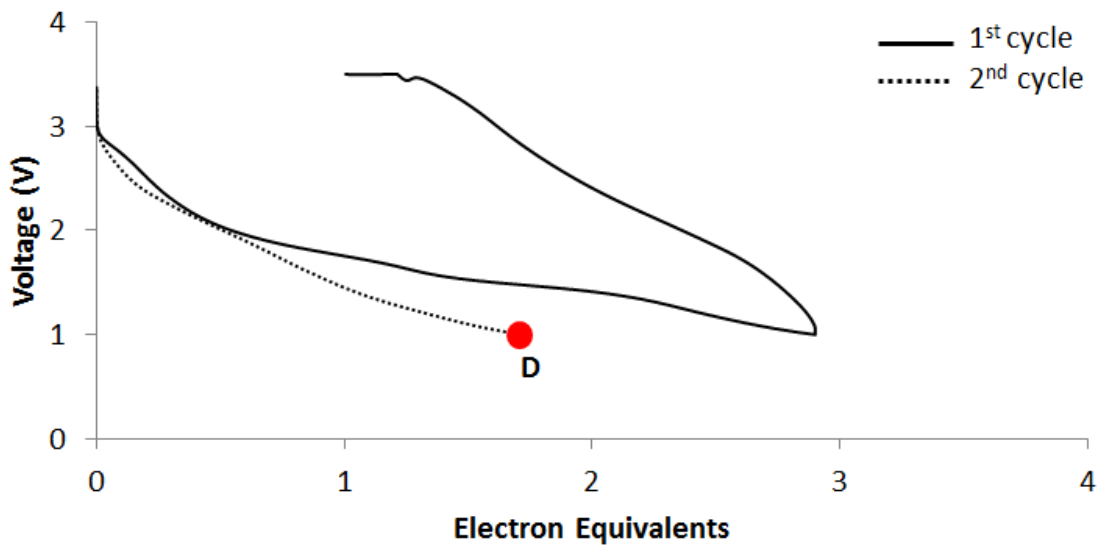

Table S3: XAFS Fitting parameters at Cu K – edge:

| Sample         | R-factor | E(0)   | S0 <sup>2</sup> | Path    | N  | N <sub>nano</sub> | R           |
|----------------|----------|--------|-----------------|---------|----|-------------------|-------------|
| As-synthesized | 0.013    | -1 ± 1 | 0.6 ± 0.1       | Cu – O  | 4  | 2.4 ± 0.4         | 1.96 ± 0.02 |
|                |          |        | 0.2 ± 0.2       | Cu – O  | 2  | 0.4 ± 0.4         | 2.20 ± 0.02 |
|                |          |        | 6 ± 2           | Cu – Fe | 1  | 6 ± 2             | 2.97 ± 0.02 |
| 1.8 V          | 0.048    | 8 ± 1  | 0.4 ± 0.2       | Cu – Cu | 12 | 5 ± 2             | 2.56 ± 0.02 |
|                |          |        | 2.4 ± 0.5       | Cu – O  | 1  | 2.4 ± 0.5         | 1.94 ± 0.03 |
|                |          |        | 6 ± 2           | Cu - Fe | 1  | 6 ± 2             | 2.95 ± 0.03 |
| 3.0 V          | 0.031    | 2 ± 2  | 0.3 ± 0.2       | Cu - Cu | 12 | 4 ± 2             | 2.52 ± 0.03 |
|                |          |        | 1.5 ± 0.5       | Cu – O  | 1  | 1.5 ± 0.5         | 1.89 ± 0.03 |
| 3.0 V, cycled  | 0.022    | 4 ± 1  | 0.4 ± 0.1       | Cu - Cu | 12 | 5 ± 1             | 2.52 ± 0.01 |
|                |          |        | 1.1 ± 0.3       | Cu – O  | 1  | 1.1 ± 0.3         | 1.87 ± 0.03 |

Table S4: XAFS Fitting parameters at Fe K – edge, for samples discharged within first cycle.

| Sample         | R-factor | E(0)           | S0 <sup>2</sup> | Path    | N  | N <sub>nano</sub> | R               |
|----------------|----------|----------------|-----------------|---------|----|-------------------|-----------------|
| As-synthesized | 0.008    | $-4.0 \pm 0.9$ | $0.34 \pm 0.05$ | Fe – O  | 4  | $1.4 \pm 0.2$     | $1.93 \pm 0.05$ |
|                |          |                | $0.34 \pm 0.05$ | Fe – Fe | 12 | $4.1 \pm 0.6$     | $3.46 \pm 0.01$ |
|                |          |                | $0.34 \pm 0.05$ | Fe – O  | 12 | $4.1 \pm 0.6$     | $3.55 \pm 0.05$ |
|                |          |                | $0.34 \pm 0.05$ | Fe – O  | 6  | $2.0 \pm 0.3$     | $1.95 \pm 0.02$ |
|                |          |                | $0.34 \pm 0.05$ | Fe – Fe | 3  | $1.0 \pm 0.2$     | $2.99 \pm 0.02$ |
|                |          |                | $0.34 \pm 0.05$ | Fe – Fe | 6  | $2.0 \pm 0.3$     | $3.46 \pm 0.01$ |
|                |          |                | $0.34 \pm 0.05$ | Fe – Cu | 3  | $1.0 \pm 0.2$     | $2.99 \pm 0.02$ |
| 1.8 V          | 0.016    | $-2 \pm 1$     | $0.24 \pm 0.05$ | Fe – O  | 4  | $1.0 \pm 0.4$     | 1.93            |
|                |          |                | $0.24 \pm 0.05$ | Fe – Fe | 12 | $3 \pm 1$         | 3.46            |
|                |          |                | $0.24 \pm 0.05$ | Fe – O  | 12 | $3 \pm 1$         | 3.54            |
|                |          |                | $0.45 \pm 0.02$ | Fe – O  | 6  | $2.7 \pm 0.2$     | 1.99            |
|                |          |                | $0.45 \pm 0.02$ | Fe – Fe | 3  | $1.4 \pm 0.1$     | 3.01            |
|                |          |                | $0.24 \pm 0.05$ | Fe – Fe | 6  | $1.4 \pm 0.5$     | 3.52            |
|                |          |                | $0.22 \pm 0.02$ | Fe – Cu | 3  | $0.66 \pm 0.1$    | 3.01            |
|                |          |                | $0.24 \pm 0.05$ | Fe – Fe | 4  | $1.0 \pm 0.4$     | 3.56            |
| 0.3 V          | 0.012    | $3.5 \pm 0.5$  | $0.4 \pm 0.1$   | Fe – Fe | 8  | $3.2 \pm 0.8$     | $2.48 \pm 0.01$ |
|                |          |                | $0.11 \pm 0.07$ | Fe – O  | 4  | $0.4 \pm 0.3$     | $1.85 \pm 0.07$ |
|                |          |                | $0.08 \pm 0.09$ | Fe – O  | 6  | $0.5 \pm 0.5$     | $2.46 \pm 0.2$  |
| 3.0 V          | 0.018    | $-2 \pm 1$     | $0.09 \pm 0.05$ | Fe – O  | 4  | $0.4 \pm 0.2$     | $1.95 \pm 0.02$ |
|                |          |                | $0.09 \pm 0.05$ | Fe – Fe | 12 | $1 \pm 0.6$       | $3.20 \pm 0.07$ |
|                |          |                | $0.09 \pm 0.05$ | Fe – O  | 12 | $1 \pm 0.6$       | $3.56 \pm 0.02$ |
|                |          |                | $0.7 \pm 0.1$   | Fe – O  | 6  | $4.2 \pm 0.6$     | $1.99 \pm 0.02$ |
|                |          |                | $0.7 \pm 0.1$   | Fe – Fe | 6  | $4.2 \pm 0.6$     | $3.00 \pm 0.03$ |
|                |          |                | $0.09 \pm 0.05$ | Fe – Fe | 6  | $0.5 \pm 0.3$     | $3.20 \pm 0.07$ |

Table S5: XAFS Fitting parameters at Fe K – edge for samples discharged within second cycle.

| Sample        | R-factor | E(0)         | Amplitude       | Path    | N  | N <sub>nano</sub> | R               |
|---------------|----------|--------------|-----------------|---------|----|-------------------|-----------------|
| 1.0 V         | 0.017    | $-3 \pm 0.9$ | $0.06 \pm 0.05$ | Fe – O  | 4  | $0.2 \pm 0.2$     | $1.95 \pm 0.08$ |
|               |          |              | $0.06 \pm 0.05$ | Fe – Fe | 12 | $0.7 \pm 0.6$     | $3.15 \pm 0.03$ |
|               |          |              | $0.06 \pm 0.05$ | Fe – O  | 12 | $0.7 \pm 0.6$     | $3.56 \pm 0.08$ |
|               |          |              | $0.49 \pm 0.06$ | Fe – O  | 6  | $2.9 \pm 0.4$     | $2.04 \pm 0.01$ |
|               |          |              | $0.49 \pm 0.06$ | Fe – Fe | 6  | $2.9 \pm 0.4$     | $3.00 \pm 0.02$ |
|               |          |              | $0.06 \pm 0.05$ | Fe – Fe | 6  | $0.4 \pm 0.4$     | $3.52 \pm 0.02$ |
|               |          |              | $0.06 \pm 0.05$ | Fe – Fe | 4  | $0.2 \pm 0.2$     | $3.62 \pm 0.01$ |
|               |          |              | $0.49 \pm 0.06$ | Fe – O  | 6  | $2.9 \pm 0.4$     | $3.69 \pm 0.02$ |
| 0.3 V         | 0.018    | $5 \pm 4$    | $0.27 \pm 0.07$ | Fe – O  | 4  | $1.1 \pm 0.3$     | $1.88 \pm 0.04$ |
|               |          |              | $0.14 \pm 0.08$ | Fe – O  | 6  | $0.8 \pm 0.4$     | $2.43 \pm 0.08$ |
|               |          |              | $1.6 \pm 0.7$   | Fe - Fe | 1  | $1.6 \pm 0.7$     | $2.49 \pm 0.03$ |
| 3.0 V, cycled | 0.031    | $-2 \pm 1$   | $0.10 \pm 0.08$ | Fe – O  | 4  | $0.4 \pm 0.3$     | $1.94 \pm 0.02$ |
|               |          |              | $0.10 \pm 0.08$ | Fe – Fe | 12 | $1.0 \pm 1.0$     | $3.89 \pm 0.07$ |
|               |          |              | $0.10 \pm 0.08$ | Fe – O  | 12 | $1.0 \pm 1.0$     | $3.55 \pm 0.02$ |
|               |          |              | $0.7 \pm 0.1$   | Fe – O  | 6  | $4.2 \pm 0.6$     | $2.00 \pm 0.02$ |
|               |          |              | $0.7 \pm 0.1$   | Fe – Fe | 6  | $4.2 \pm 0.6$     | $3.02 \pm 0.02$ |
|               |          |              | $0.10 \pm 0.08$ | Fe – Fe | 6  | $0.6 \pm 0.5$     | $3.89 \pm 0.07$ |
